# Supplementary material
Source: PubMed Central journal article supplement (PMC3644139)
Supplement: supp_126.6.1381_JCS116996.pdf [file supp_126.6.1381_JCS116996.pdf]

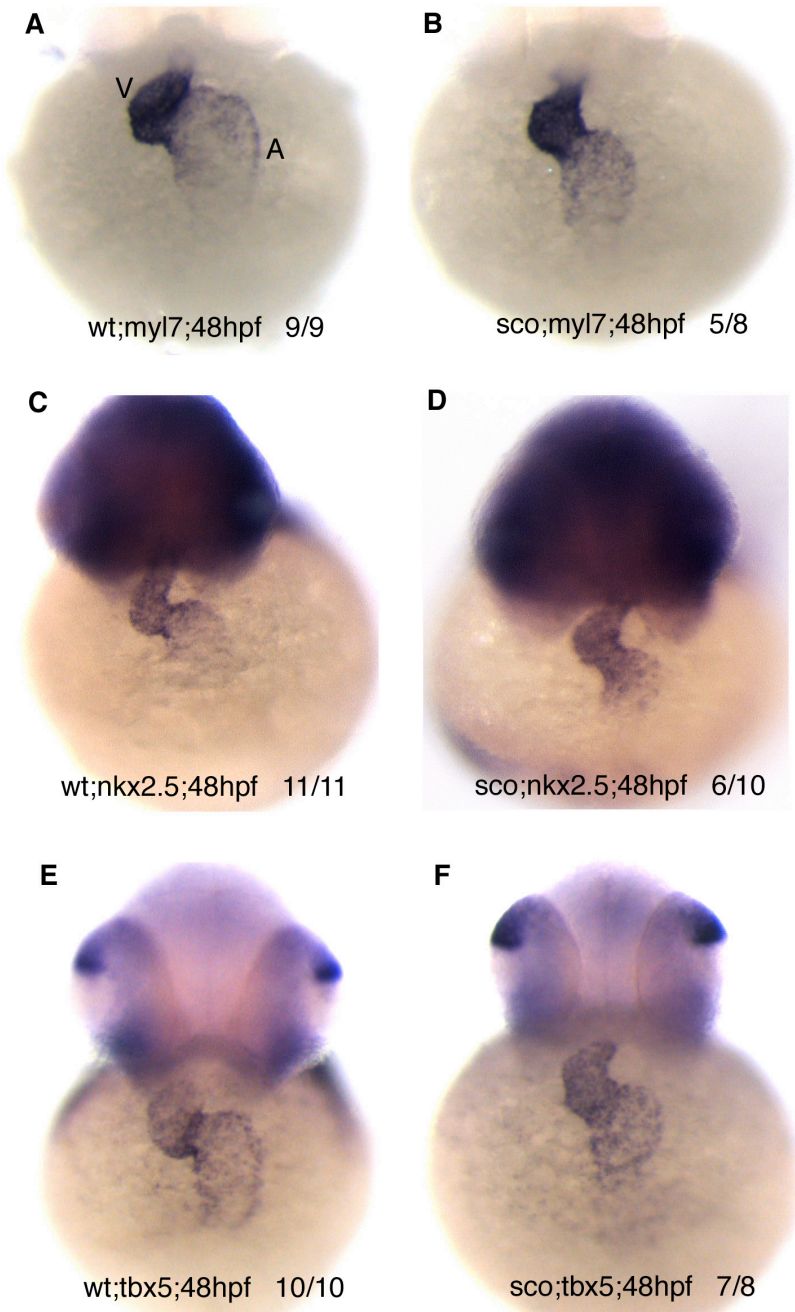

**Fig. S1. Cardiac genes were not affected in *sco*<sup>te382</sup> mutants.** Wild-type (A, C, E) and *sco*<sup>te382</sup> mutant (B, D, F) embryos at 48 hpf were subjected to whole-mount RNA in situ analyses with *myl7* (A, B); *nkx2.5* (C, D); or *tbx5* (E, F) probes. A, atrium; V, ventricle.

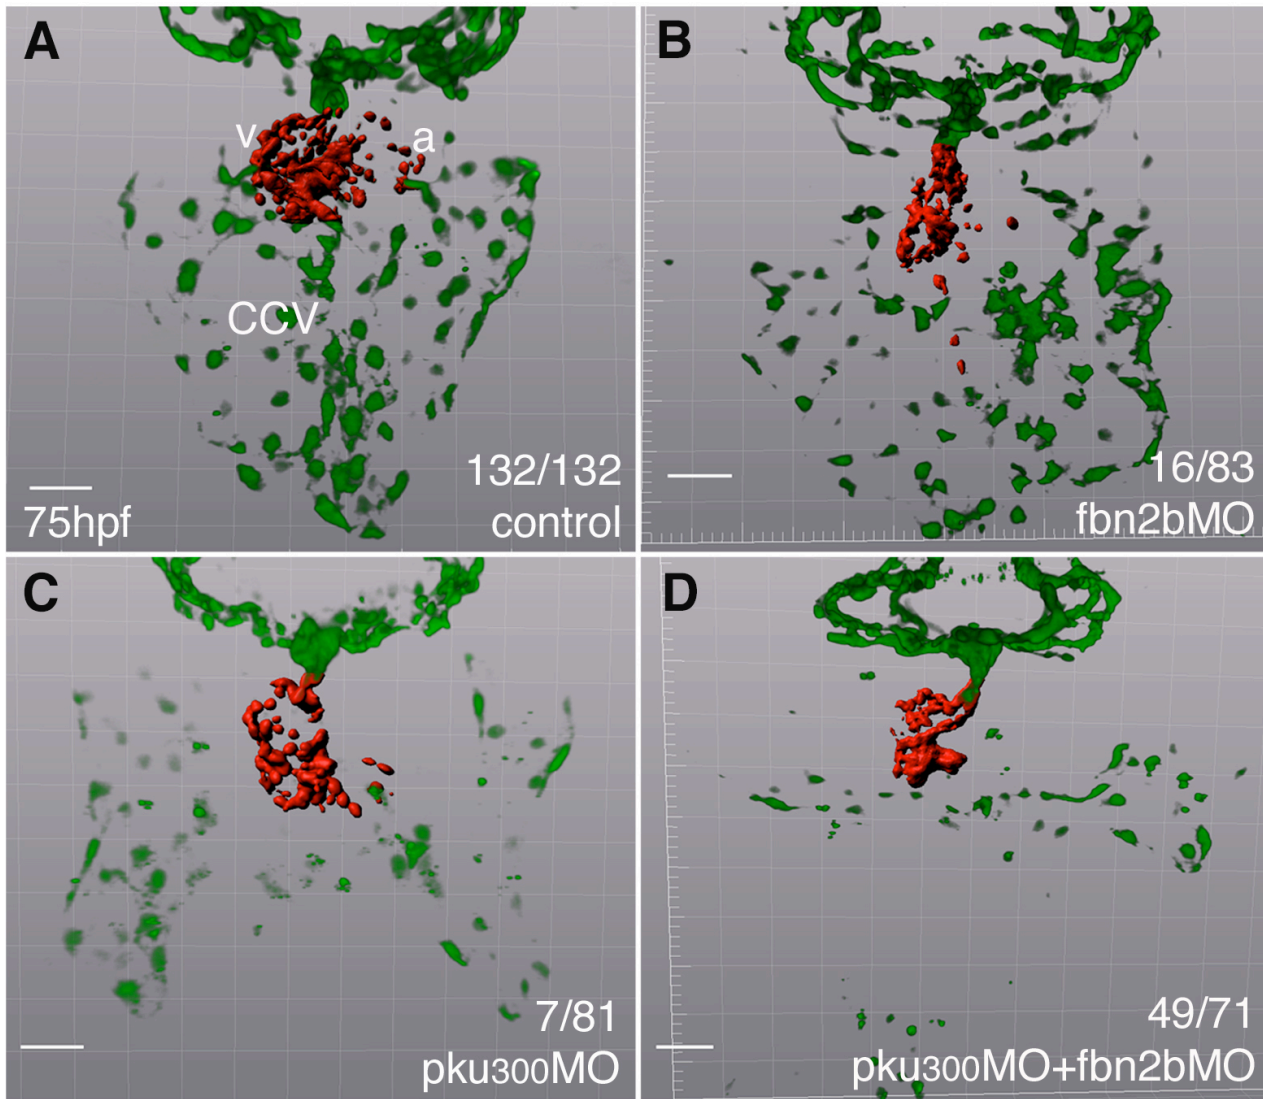

**Fig. S2. Both *fbn2b* and *pku300* contribute to the formation of atrial endocardium and common cardinal vein (CCV).** Compared with wild-type siblings (A), either *fbn2b*MO (0.4 ng) or *pku300*MO (4.8 ng) knockdown led to smaller percentages of morphants (16/83 by *fbn2b*MO; 7/81 by *pku300*MO) that had defects in the atrial endocardium or CCV (B, C), but simultaneous knockdown by low-dose of *fbn2b*MO and *pku300*MO resulted more morphants (49/71) that had defects in the atrial endocardium and CCV (D), suggesting a genetic interaction between *fbn2b* and *pku300* genes. Scale bar, 50  $\mu$ m.

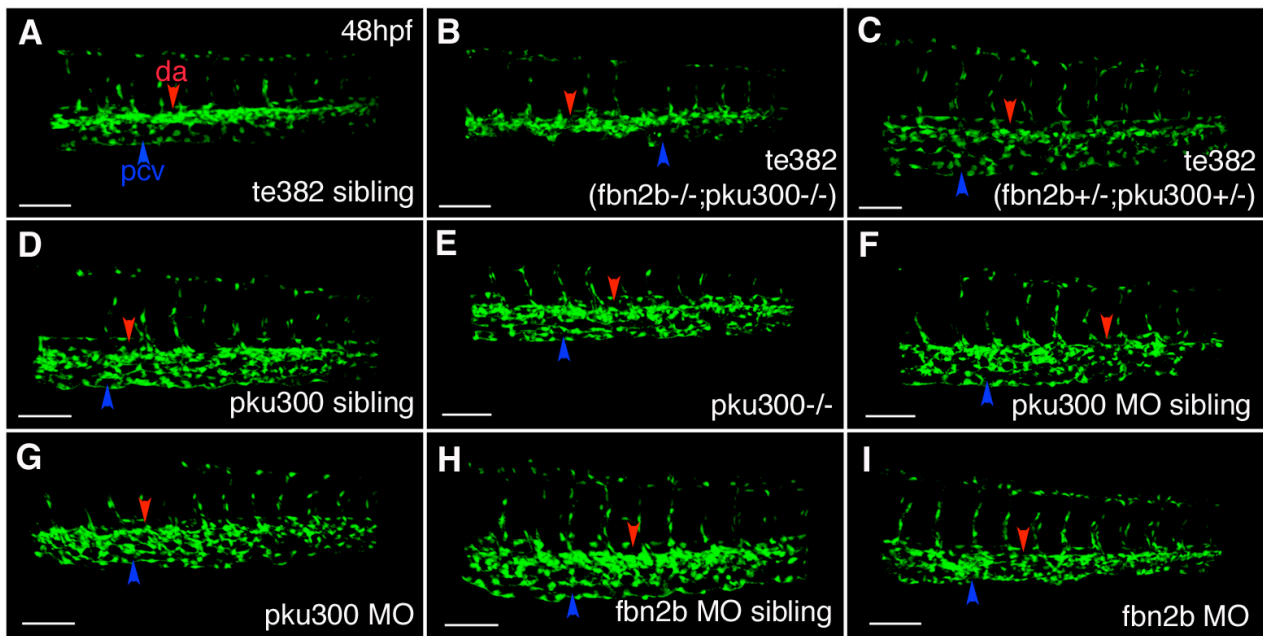

**Fig. S3. Both *fbn2b* and *pku300* are required for the development of the caudal vein.** (A-C) Compared with a wild-type sibling (A), a group II mutant (*fbn2b*<sup>-/-</sup>;*pku300*<sup>-/-</sup>) had severe defect in the caudal vein (B), while a group I mutant (*fbn2b*<sup>+/-</sup>;*pku300*<sup>+/-</sup>) had relatively normal caudal vein (C). (D-G) Either a *pku300*<sup>-/-</sup> mutant (E) or *pku300*MO morphant (G) had mild defect in the caudal vein as those of controls (D, F). (H-I) Compared with a *fbn2b*MO sibling (H), a *fbn2b*MO morphant had mild defect in the caudal vein (I). Scale bar, 100  $\mu$ m.

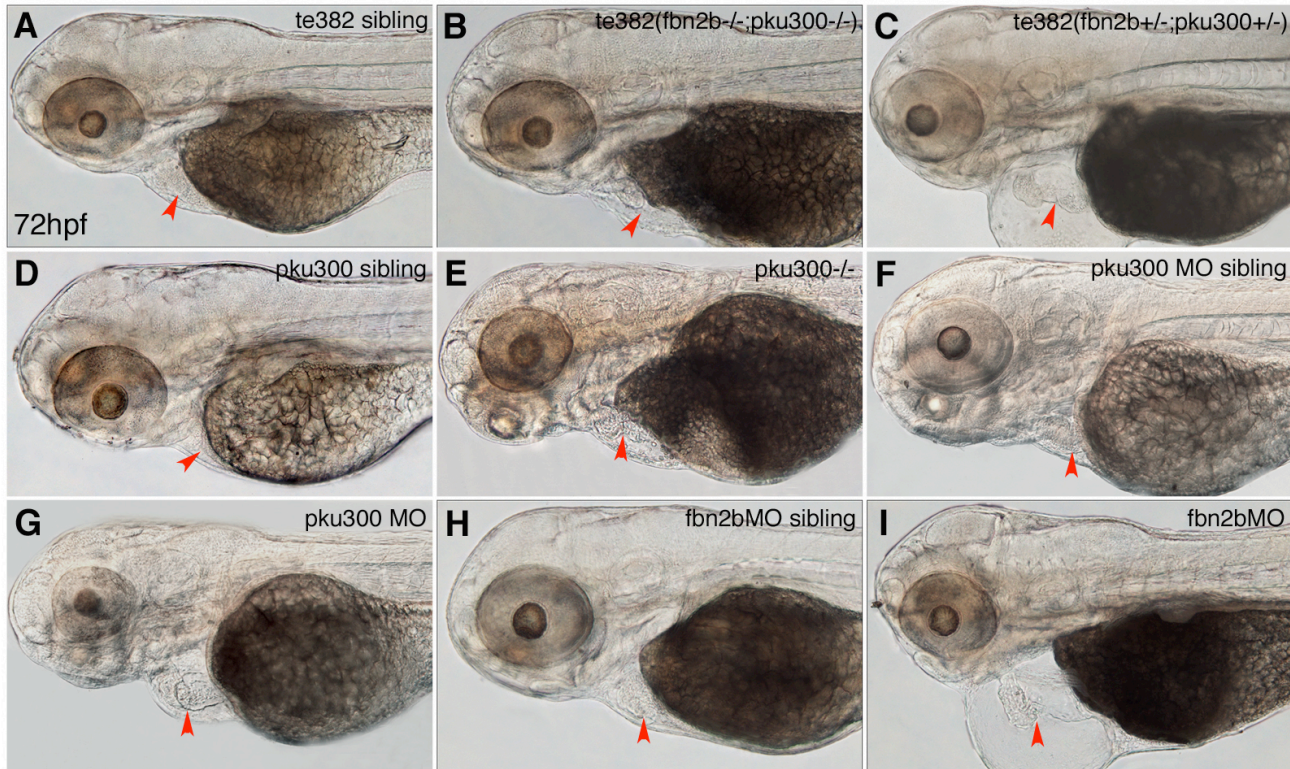

**Fig. S4. Both *fbn2b* and *pku300* are required for heart development.** (A-C) Compared with a wild-type sibling (A), either a group II mutant (*fbn2b*<sup>-/-</sup>;*pku300*<sup>-/-</sup>) (B), or a group I mutant (*fbn2b*<sup>+/-</sup>;*pku300*<sup>+/-</sup>) (C) had heart defects at 72 hpf. (D-G) Either a *pku300*<sup>-/-</sup> mutant (E) or *pku300*MO morphant (G) had heart defects, compared with their controls (D, F). (H-I) Compared with a *fbn2b*MO sibling (H), a *fbn2b*MO morphant had heart defects (I).

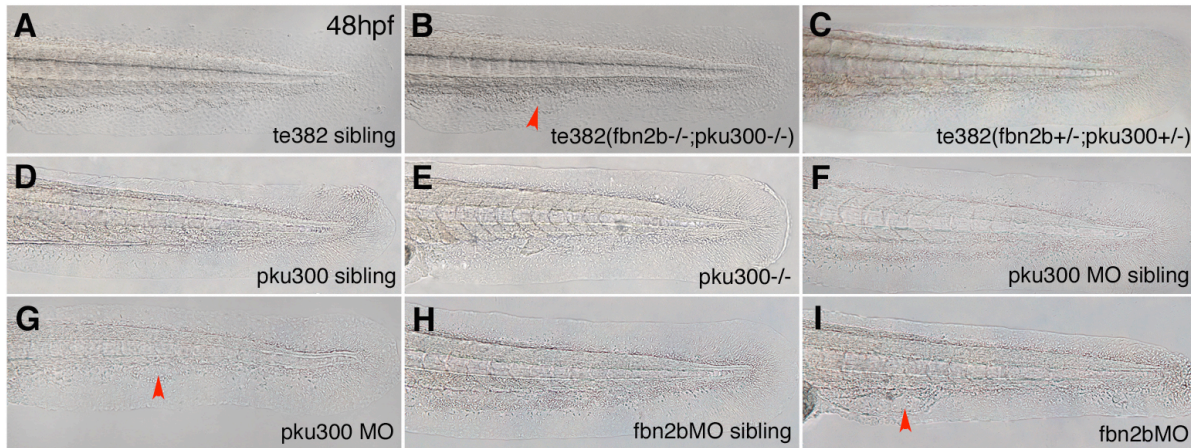

**Fig. S5. Both *fbn2b* and *pku300* are required for the development of the ventral tail.** (A-C) Compared with a wild-type sibling (A), a group II mutant (*fbn2b*<sup>-/-</sup>;*pku300*<sup>-/-</sup>) had severe defects in the ventral tail (B), while a group I mutant (*fbn2b*<sup>+/-</sup>;*pku300*<sup>+/-</sup>) had relatively normal ventral tail (C). (D-G) Either a *pku300*<sup>-/-</sup> mutant (E) or *pku300*MO morphant (G) had mild defects in the ventral tail, compared with those of controls (D, F). (H-I) Compared with a *fbn2b*MO sibling (H), a *fbn2b*MO morphant had defects in the ventral tail (I). Red arrowheads point to bubble-like deformed tissues.

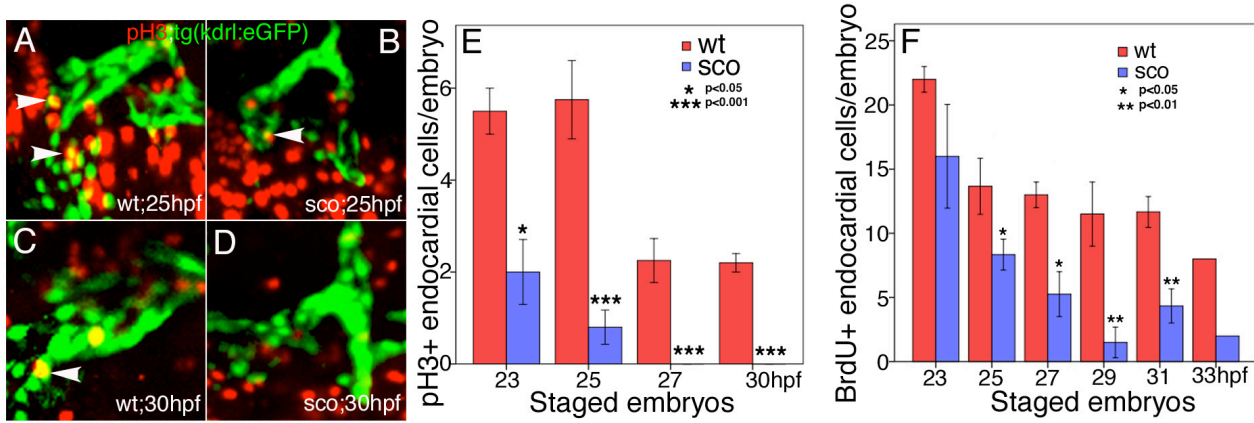

**Fig. S6. Endocardial cell proliferation is defective in  $sco^{te382}$  mutants.**

(A-E) wild-type (A, C) and  $sco^{te382}$  mutant (B, D)  $Tg(kdrl:eGFP)$  embryos at 23 hpf and 25 hpf (A, B), 27 hpf and 30 hpf (C, D) were subjected to immunostaining with anti-pH3 antibody. Images were photographed under Zeiss 510 confocal microscope. White arrowheads point to pH3-positive  $Tg(kdrl:eGFP)$  endocardial cells in the heart tube. (E) The pH3-positive endocardial cells were scored and statistically analyzed in wild-type and  $sco^{te382}$  mutant embryos from 23 to 30 hpf. (F) The BrdU-positive  $Tg(kdrl:eGFP)$  endocardial cells were scored and statistically analyzed in wild-type and  $sco$  mutant embryos from 23 to 33 hpf. Note that pH3- and BrdU-positive endocardial cells were gradually decreased in  $sco^{te382}$  mutants. (E-F)  $n=3-5$ ; mean $\pm$ SEM; student's t-test.



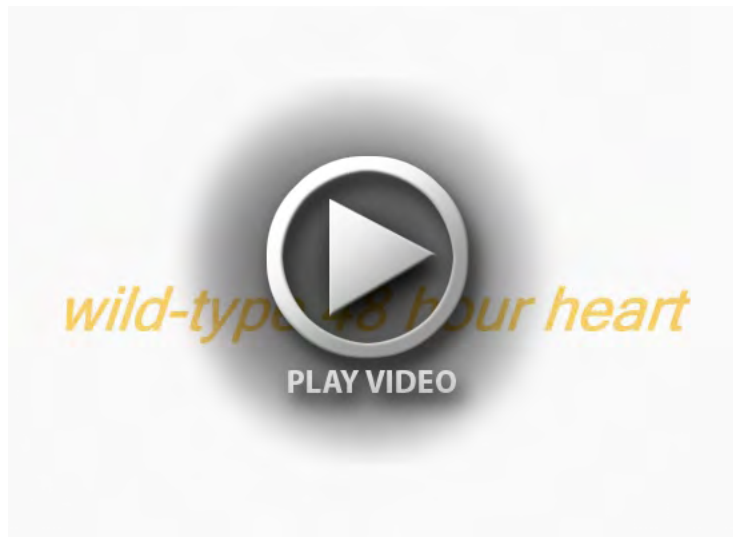

**Movie 1.** A wild-type embryo at 48 hpf, noting that blood flowed from the atrium to ventricle; followed by a *sco*<sup>te382</sup> mutant embryo at 48 hpf, noting blood flow from the atrium to ventricle, but leaked back from the ventricle to atrium.

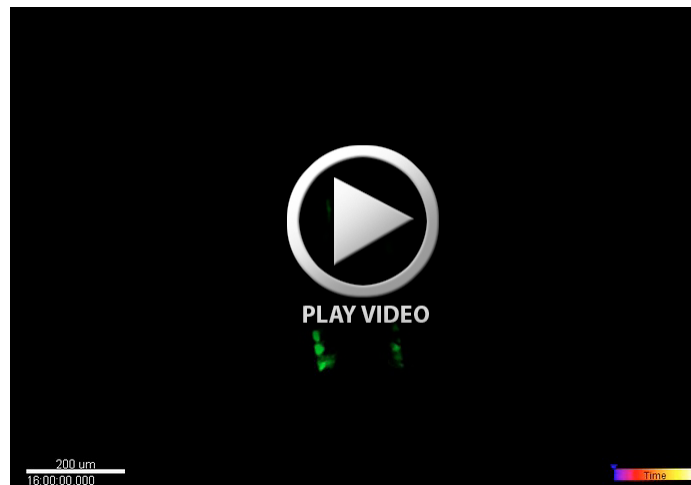

**Movie 2.** Live image showed that Tg(*kdr1:EGFP*) endocardial cells fused in the midline and then jogged toward the left in a wild-type embryo from 16 hpf to 22 hpf. Dorsal view, with the anterior on the bottom. Scale bar, 200  $\mu$ m.

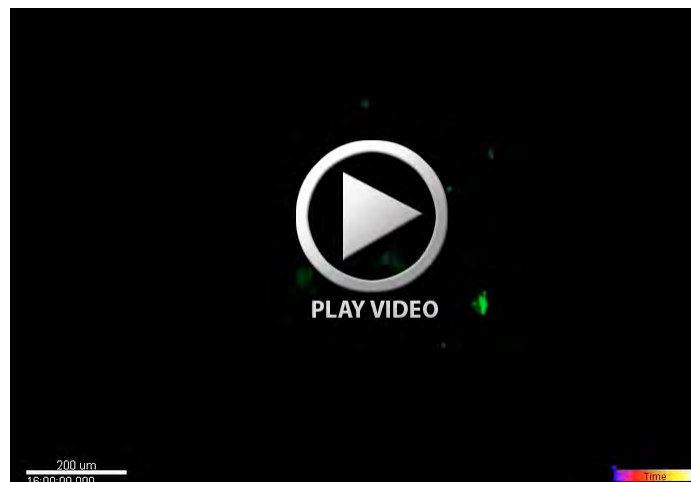

**Movie 3.** Live image showed that Tg(*kdr1:EGFP*) endocardial cells fused in the midline and then jogged toward the left in a *sco*<sup>te382</sup> embryo from 16 hpf to 23 hpf. Dorsal view, with the anterior on the bottom. Scale bar, 200  $\mu$ m.



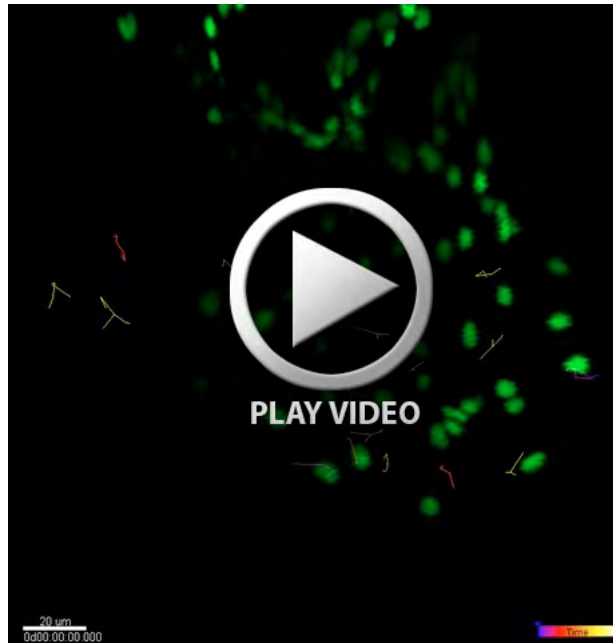

**Movie 4.** Live image showed 16 Tg(*fli1:nuEGFP*) endocardial cells underwent cell division in a wild-type embryo from 29 to 36 hpf. Ventral view, with the anterior on the top. Scale bar, 20  $\mu$ m.

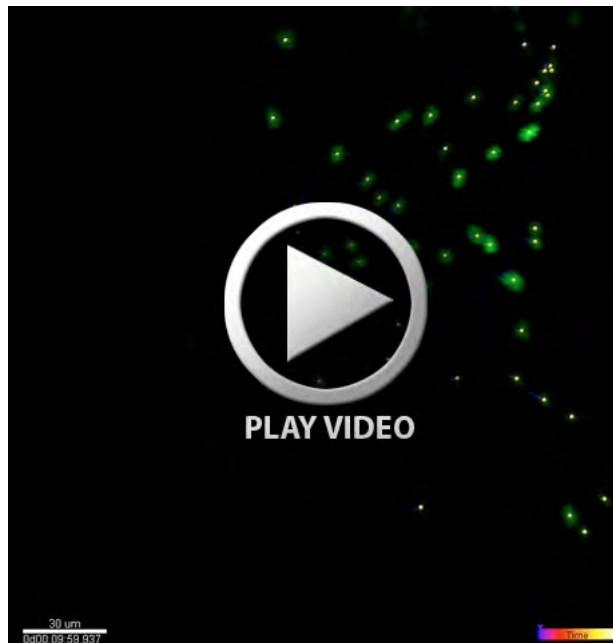

**Movie 5.** Live image showed no Tg(*fli1:nuEGFP*) endocardial cells underwent cell division in a *sco*<sup>te382</sup> embryo from 29 to 36 hpf. Ventral view, with the anterior on the top. Scale bar, 30  $\mu$ m.

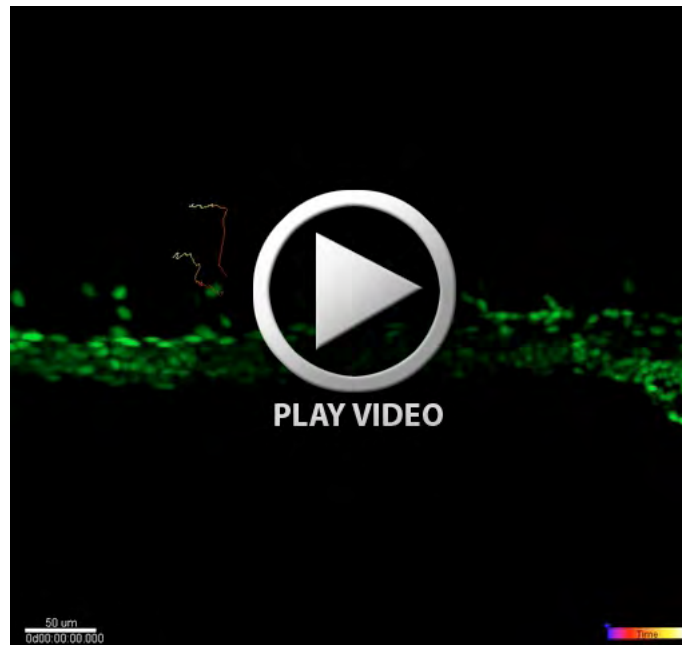

**Movie 6.** Live image showed formation of intersegmental vessels in a wild-type *Tg(fil:nuEGFP)* embryo from 23 to 33 hpf. Lateral view, with the anterior on the left. Scale bar, 50  $\mu\text{m}$ .

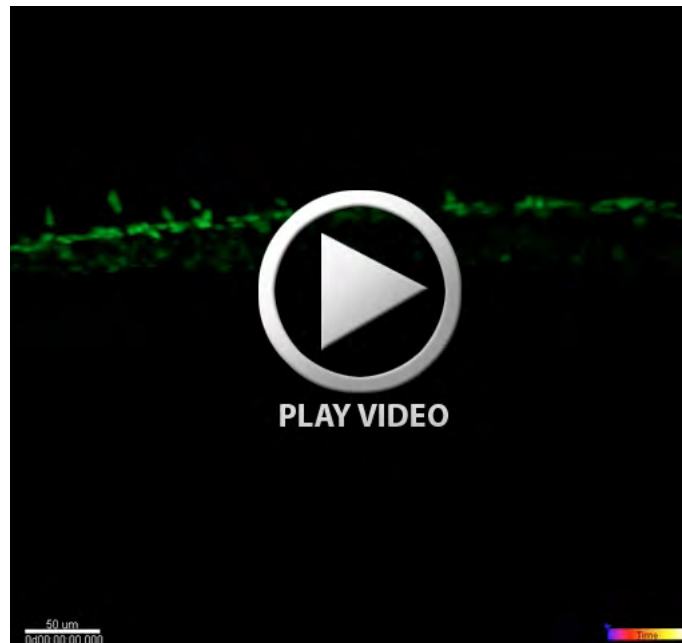

**Movie 7.** Live image showed formation of intersegmental vessels in a *sco<sup>te382</sup>* *Tg(fil:nuEGFP)* embryo from 22 to 33 hpf. Note normal vascular endothelial cell division and migration. Lateral view, with the anterior on the left. Scale bar, 50  $\mu\text{m}$ .

**Table S1. Primer sequences for genetic markers during the chromosomal walking.**

| Marker | Forward Primer           | Reverse Primer              |
|--------|--------------------------|-----------------------------|
| 1      | AATCAGACCGGCTGAGAAGA     | CGAAGCCTCGTGAGTGTGTA        |
| 2      | CCCACATCCACGGAGACTAC     | TGGCTCTCCAAGTGGTCTTT        |
| 3      | TGGATGGCAGTGCTGATATG     | GAAGAGGTTTGGAAACCACCA       |
| 4      | AATCAGACCGGCTGAGAAGA     | AAACTCCCGCAAGTTCAGC         |
| 5      | GTGTTGCTTGCCAGGCCTCT     | AACAAAATGGGCAGGGCTTGA       |
| 6      | TCACAATTGTTGTTGTGCAATGCT | CCTCATGCCATTTCCCCTTTC       |
| 7      | GGGACACGTCCCACCCTAAA     | GGAGTCTGTCAGGAACGCTGAA      |
| 8      | CCGGTATGACTGTAGGGGTCCA   | TGGACTGTAAAAGGCCAACTATTTAGA |
| 9      | TTCTCCGCTGGCCAAAAGTC     | CATCGCCAGTGTTTCGTTCG        |

**Table S2. Mutations of both *fbn2b* and *pku300* contributed to *sco*<sup>te382</sup> mutant phenotypes.**

Two groups of mutants were classified from heterozygous *sco*<sup>te382</sup> crosses, one showing defects only in the heart (group I) and the other showing defects both in the heart and tail (group II). 12 embryos of each of wild-type siblings, group I mutants, and group II mutants were sequenced. Their corresponding phenotype (PT), genotype (GT), and embryo numbers (Em#) were shown. Note that phenotypical wild-type siblings had four types of genotypes, including 1) *fbn2b*<sup>+/-</sup> (G3935T) and *pku300*<sup>+/-</sup> (C946T); 2) *fbn2b*<sup>+/-</sup>; 3) *pku300*<sup>+/-</sup>; and 4) wild-type. Group I mutants were all both *fbn2b*<sup>+/-</sup> (G3935T) and *pku300*<sup>+/-</sup> (C946T). Group II mutants were all both *fbn2b*<sup>-/-</sup> (G3935T) and *pku300*<sup>-/-</sup> (C946T).

| PT<br>GT<br>Em# | Wild-type siblings |               | Group I<br>Abnormal heart |               | Group II<br>Abnormal heart<br>and tail |               |
|-----------------|--------------------|---------------|---------------------------|---------------|----------------------------------------|---------------|
|                 | <i>fbn2b</i>       | <i>pku300</i> | <i>fbn2b</i>              | <i>pku300</i> | <i>fbn2b</i>                           | <i>pku300</i> |
| 1               | G/T                | C/T           | G/T                       | C/T           | T                                      | T             |
| 2               | G/T                | C/T           | G/T                       | C/T           | T                                      | T             |
| 3               | G/T                | C/T           | G/T                       | C/T           | T                                      | T             |
| 4               | G                  | C             | G/T                       | C/T           | T                                      | T             |
| 5               | G                  | C             | G/T                       | C/T           | T                                      | T             |
| 6               | G/T                | C/T           | G/T                       | C/T           | T                                      | T             |
| 7               | G/T                | C             | G/T                       | C/T           | T                                      | T             |
| 8               | G/T                | C/T           | G/T                       | C/T           | T                                      | T             |
| 9               | G                  | C/T           | G/T                       | C/T           | T                                      | T             |
| 10              | G                  | C             | G/T                       | C/T           | T                                      | T             |
| 11              | G/T                | C             | G/T                       | C/T           | T                                      | T             |
| 12              | G                  | C/T           | G/T                       | C/T           | T                                      | T             |
